# Supplementary material
Source: PubMed Central journal article supplement (PMC2719376)
Supplement: supp_R900017200_JBCsupplementalDNAligMini.pdf [file supp_R900017200_JBCsupplementalDNAligMini.pdf]

Supplemental Material

**DNA Ligases: Progress and Prospects**

Stewart Shuman

Molecular Biology Program, Sloan Kettering Institute, New York, NY 10066

Supplemental Figures S1 – S4

## Phylogenetic Distribution of ATP and NAD<sup>+</sup> Ligases

|                         | ATP                                                                                                                                                                      | NAD <sup>+</sup>                                                                                                                                                                              |
|-------------------------|--------------------------------------------------------------------------------------------------------------------------------------------------------------------------|-----------------------------------------------------------------------------------------------------------------------------------------------------------------------------------------------|
| <b>Eukaryal Viruses</b> | <ul style="list-style-type: none"> <li>✓ <i>Chordopoxvirus</i></li> <li>✓ <i>Baculovirus</i></li> <li>✓ <i>Chlorella virus</i></li> <li>✓ <i>Asfarviridae</i></li> </ul> | <ul style="list-style-type: none"> <li>✓ <i>Entomopoxvirus</i></li> <li>✓ <i>Iridovirus</i></li> <li>✓ <i>Mimivirus</i></li> </ul>                                                            |
| <b>Eukarya</b>          | ✓                                                                                                                                                                        | None                                                                                                                                                                                          |
| <b>Archaea</b>          | ✓                                                                                                                                                                        | <ul style="list-style-type: none"> <li>✓ <i>Haloferax</i></li> <li>✓ <i>Haloarcula</i></li> <li>✓ <i>Natronomonas</i></li> <li>✓ <i>Halorubrum</i></li> <li>✓ <i>Haloquadratum</i></li> </ul> |
| <b>Bacteria</b>         | ✓                                                                                                                                                                        | ✓                                                                                                                                                                                             |
| <b>Bacteriophage</b>    | <ul style="list-style-type: none"> <li>✓ <i>T4, T7</i></li> </ul>                                                                                                        | <ul style="list-style-type: none"> <li>✓ <i>T5, EL</i></li> </ul>                                                                                                                             |

Figure S1. Distribution of ATP-dependent and NAD<sup>+</sup>-dependent DNA ligases among cellular and viral taxa. Check marks denote the presence of biochemically characterized DNA ligases (or confidently assigned structural homologs) in the proteomes of species within the three domains of cellular life or the proteomes of DNA viruses that replicate in eukaryal or bacterial hosts. Black check marks indicate that ligases of a particular clade are found in all organisms within the domain. Blue check marks specify that a particular type of ligase is found in only some members of the organismal/viral taxon. To date, NAD<sup>+</sup>-dependent ligases have not been found in any eukaryal organism. Biochemical evidence that NAD<sup>+</sup>-dependent ligases are encoded by entomopoxviruses, mimivirus, and *Haloferax volcanii* is reported in the publications cited below.

1. Sriskanda, V., Moyer, R.W., and Shuman, S. (2001) NAD<sup>+</sup>-dependent DNA ligase encoded by a eukaryotic virus. *J. Biol. Chem.* **276**, 36100-36109.
2. Tong, J., Feng, H., Huang, J., Afonso, C.L., Rock, D.L., Barany, F., and Cao, W. (2004) *Biochim. Biophys. Acta* **1701**, 37-48.
3. Benarroch, D., and Shuman, S. (2006) Characterization of mimivirus NAD<sup>+</sup>-dependent DNA ligase. *Virology* **353**, 133-143.
4. Zhao, A, Gray, F.C. and MacNeill, S.A. (2006) ATP- and NAD<sup>+</sup>-dependent DNA ligases share an essential function in the halophilic archaeon *Haloferax volcanii*. *Mol. Microbiol.* **59**, 743-752.
5. Poivedin, L., and McNeill, S.A. (2006) Biochemical characterization of LigN, and NAD<sup>+</sup>-dependent DNA ligase from the halophilic euryarchaeon *Haloferax volcanii* that displays maximal *in vitro* activity at high salt concentrations. *BMC Mol. Biol.* **7**, 44.

### *Sulfolobus solfataricus* DNA ligase

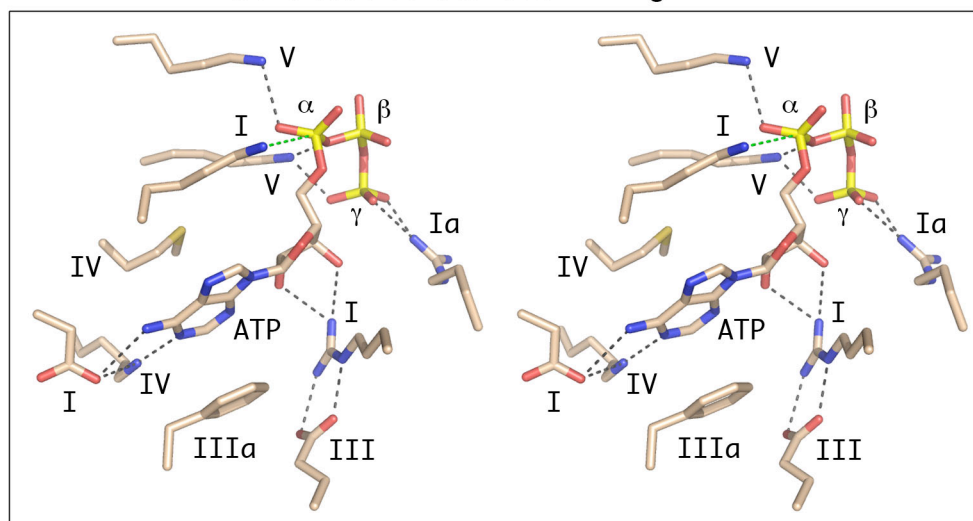

### Covalent Nucleotidyltransferase Superfamily Motifs

|         | I         | Ia  | III      | IIIa  | IV     | V     |
|---------|-----------|-----|----------|-------|--------|-------|
| EcoLigA | CELKLDGLA | TRG | LEVRGEVF | FCYGV | DGVVVK | AVAFK |
| EfaLigA | CELKIDGLA | TRG | VEVRGECY | FLYTV | DGIVVK | AIAYK |
| TfiLigA | VEHKVDGLS | TRG | LEVRGEVY | TFYAL | DGVVVK | ALAYK |
| MtuLigA | CELKIDGVA | TRG | LEVRGEVF | ICHGL | DGVVVK | AIAYK |
| HinLigA | CEPKLDGLA | TRG | LEVRGEVF | NAYGI | DGTVLK | AIAYK |
| BstLigA | CELKIDGLA | TRG | LEARGEAF | FVYGL | DGIVVK | AIAYK |
| T7Lig   | AEIKYDGVR | SRT | FMLDGEIM | KLYAI | EGLIVK | WVKMK |
| ChvLig  | ATPKIDGIR | SRT | EGSDGEIS | YWFYD | EGVMIR | LLKMK |
| HuLig1  | CEYKYDGQR | SRN | FILDTEAV | YAFDI | EGLMVK | WLKLL |
| SsoLig  | VDYKYDGER | SRR | FIIEGEIV | FLFDL | EGVMVK | WIKLK |
| PfuLig  | FEIKYDGAR | SRR | AIVEGELV | NLFDV | EGLMAK | WLKIK |
| MtuLigD | FEGKWDGYR | SRS | VVLDGEAV | WAFDL | EGVIAK | WVKDK |
| T4Rnl2  | AREKIHGNT | KRT | YQVFGEFA | YVFDD | EGYVLK | AIKCK |
| TbREL1  | ACEKVHGNT | KRS | LVLNGELF | FAFDI | EGVVIR | IIKLR |
| T4Rnl1  | ILTKEDGSL | SKG | FTANFEFV | ILLNV | EGYVAV | HFKIK |
| PabRnl3 | VEEKVDGYN | TRG | LILVGEMA | FLFDV | EGIIMK | IVKYV |
| ChVCE   | VSEKTDGIR | DRA | SIFDGEIC | VLFDA | DGLIIM | LFKLL |
| CaLCE   | VCEKTDGLR | TRE | TLLDGEIV | VIFDA | DGLIYT | LLKWK |

Figure S2. **Defining features of the covalent nucleotidyltransferase superfamily.** The superfamily comprises  $\text{NAD}^+$ -dependent DNA ligases, ATP-dependent DNA and RNA ligases, and GTP-dependent RNA guanylyltransferases (capping enzymes), all of which catalyze NMP transfer from NTP to polynucleotide 5'-monophosphate (ligases) or 5' diphosphate (capping enzymes) termini through a covalent enzyme-(lysine- $\text{N}\zeta$ )-NMP intermediate. The active site, depicted in stereo in the *top panel* for *Sulfolobus solfataricus* DNA ligase (pdb 2HIX), is composed of amino acids located in the six NTase motifs. Motifs I, Ia, III, IIIa, IV and VI are aligned in the *bottom panel* for all superfamily members for which crystal structures have been determined. These comprise subfamilies of  $\text{NAD}^+$ -dependent DNA ligases (LigA, from *Escherichia coli*, *Enterococcus faecalis*, *Thermus filiformis*, *Mycobacterium tuberculosis*, *Haemophilus influenzae*, *Bacillus stearothermophilus*), ATP-dependent DNA ligases (phage T7, *Chlorella* virus, human Lig1, *S. solfataricus*, *Pyrococcus furiosus*, *M. tuberculosis* LigD), ATP-dependent RNA ligases (T4 Rnl2, *Trypanosoma brucei* REL1, T4 Rnl1, *Pyrococcus abyssi* Rnl3) and GTP-dependent RNA capping enzymes (from *Chlorella* virus and *Candida albicans*). The motif I lysine is the step 1 nucleophile that forms the covalent lysyl-NMP adduct. In the SsoLig structure, the motif I lysine  $\text{N}\zeta$  is 3.7 Å from the  $\alpha$ -phosphorus in an apical orientation ( $154^\circ$ ) with respect to the bridging oxygen of the  $\text{PP}_i$  leaving group. The purine base is characteristically sandwiched between the motif IIIa aromatic side chain and a motif IV aliphatic residue (both in green in the bottom panel) Adenine specificity is typically conferred by two charged amino acids: an acidic motif I residue that accepts a H-bond from adenine N7 and a motif IV lysine that donates a H-bond to adenine-N1. The adenine-specificity residues of ATP-dependent DNA/RNA ligases are highlighted in blue in the bottom panel (except in the few cases where these contacts do not apply).

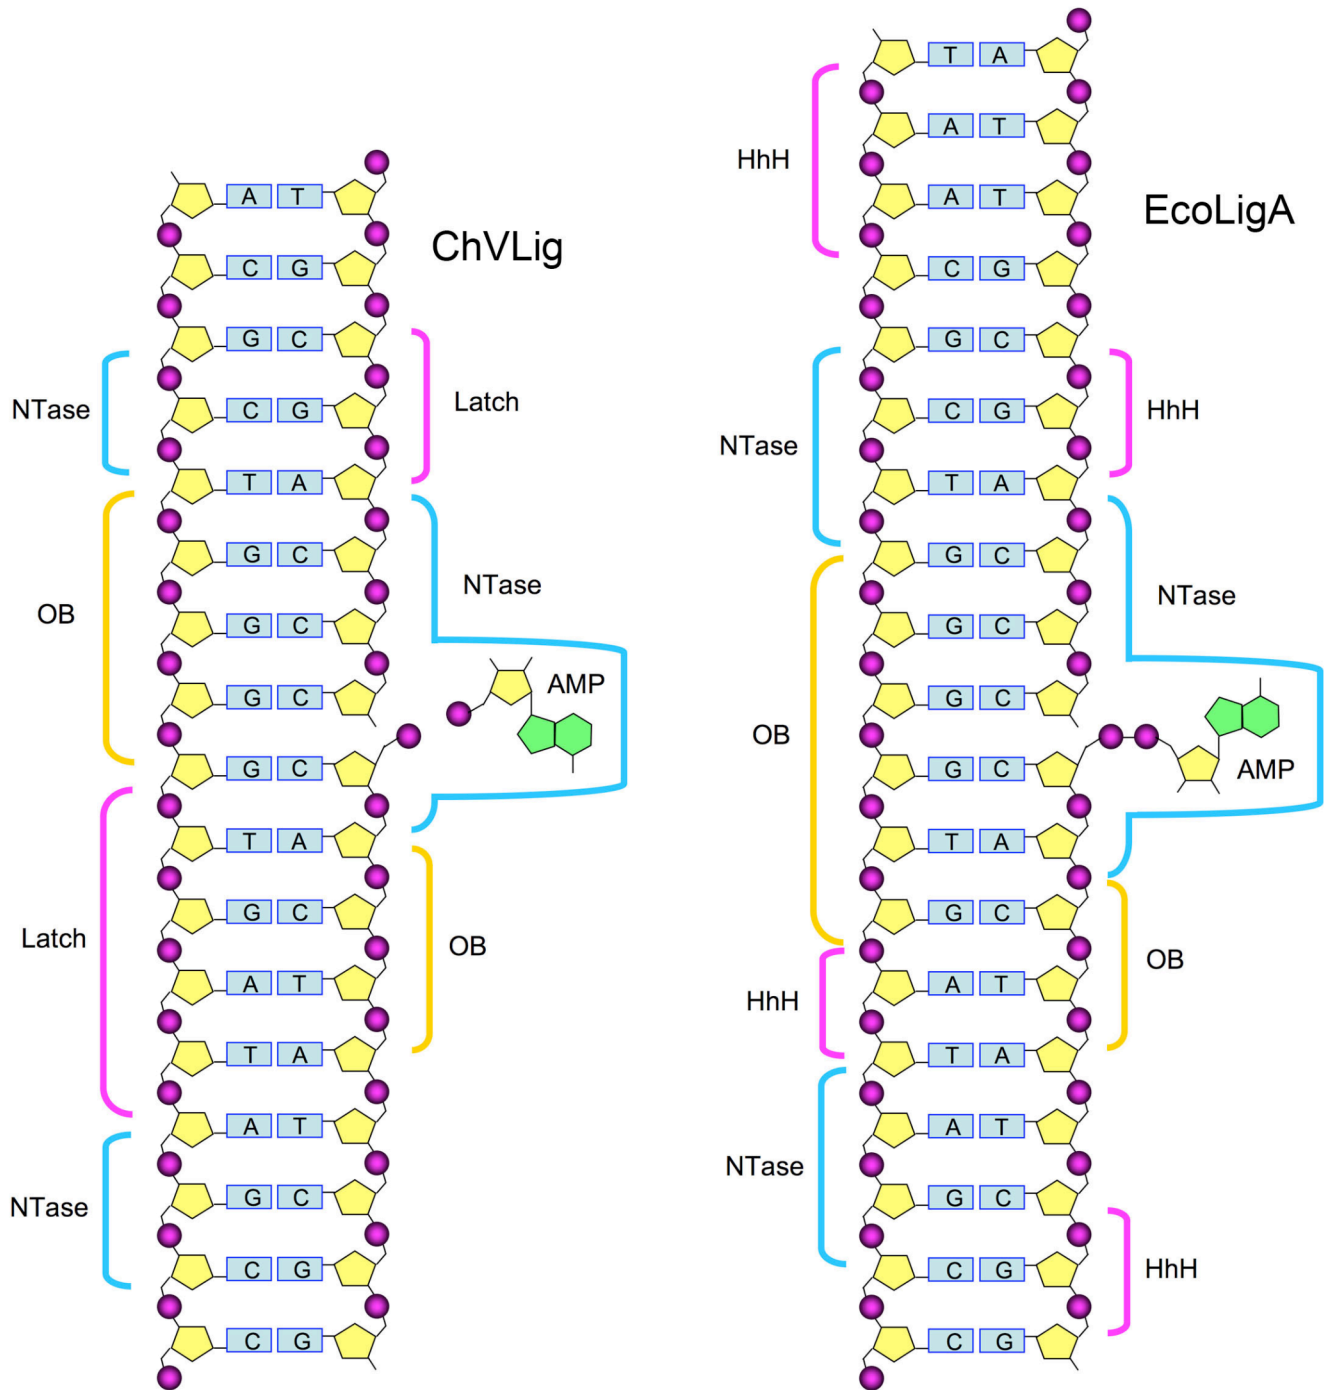

Figure S3. **Domain “footprint” of ChVLig and *E. coli* LigA contacts to DNA.** The nicked duplex DNA is depicted as a two-dimensional cartoon, with the continuous template strand on the left and the nicked strands on the right. The ChVLig structure (left) captures the ligase-adenylate intermediate bound to a 5'-PO<sub>4</sub> nick. The EcoLigA structure (right) captures the ligase bound to nicked DNA-adenylate. In both cases, the extrahelical 5'-adenylate is bound within a conserved AMP-binding pocket of the NTase domain. The DNA strand segments contacted by the individual ligase domain modules are indicated in brackets. The NTase and OB domains have similar DNA footprints in both ligase structures.

| Archaeon                                                 | Nucleotide specificity |
|----------------------------------------------------------|------------------------|
| <i>Acidithiobacillus ferrooxidans</i> <sup>1</sup>       | ATP                    |
| <i>Aeropyrum pernix</i> <sup>2</sup>                     | ATP ADP                |
| <i>Ferroplasma acidarmanus</i> <sup>3</sup>              | ATP                    |
| <i>Ferroplasma acidophilum</i> <sup>1</sup>              | ATP NAD <sup>+</sup>   |
| <i>Methanobacterium thermoautotrophicum</i> <sup>4</sup> | ATP                    |
| <i>Picrophilus torridus</i> <sup>1</sup>                 | ATP NAD <sup>+</sup>   |
| <i>Pyrococcus horikoshii</i> <sup>5</sup>                | ATP                    |
| <i>Staphylothermus marinus</i> <sup>6</sup>              | ATP ADP                |
| <i>Sulfophobococcus zilligii</i> <sup>7</sup>            | ATP ADP GTP            |
| <i>Sulfolobus acidocaldarius</i> <sup>1</sup>            | ATP                    |
| <i>Sulfolobus shibatae</i> <sup>8</sup>                  | ATP                    |
| <i>Thermococcus fumicolans</i> <sup>9</sup>              | ATP NAD <sup>+</sup>   |
| <i>Thermococcus kodakarensis</i> <sup>10</sup>           | ATP NAD <sup>+</sup>   |
| <i>Thermococcus</i> sp. <sup>11</sup>                    | ATP NAD <sup>+</sup>   |
| <i>Thermoplasma acidophilum</i> <sup>1</sup>             | ATP NAD <sup>+</sup>   |

Figure S4. **Diverse nucleotide substrate specificities of archaeal ATP-dependent DNA ligases.** All known archaea have an ATP-dependent DNA ligase. The sources of those archaeal ligase that have been characterized biochemically are listed above; the relevant literature is cited below. The archaeal ligases fall into two broad classes: (i) monospecific ligases that utilize ATP only as the nucleotide substrate; and (ii) dual-specificity ligases that utilize ATP plus another nucleotide. The second nucleotide substrate can be NAD<sup>+</sup> or ADP, as specified. The *S. zilligii* DNA ligase is exceptional in that it is reported to utilize three nucleotide substrates: ATP, ADP, and GTP.

1. Ferrer, M. et al., (2008) *Proc. Natl Acad. Sci. USA* 105, 8878-8883.
2. Jeon, S.J., and Ishikawa, K. (2003) *FEBS Lett.* 550, 69-73.
3. Jackson, B.R. et al. (2007) *Extremophiles* 11, 315-327.
4. Sriskanda, V., et al. (2000) *Nucleic Acids Res.* 28, 2221-2228.
5. Keppetipola, N., and Shuman, S. (2005) *J. Bacteriol.* 187, 6902-6908.
6. Seo, M.S. et al. (2007) *J. Biotechnol.* 128, 519-530.
7. Sun, Y. et al. (2008) *Envir. Microbiol.* 10, 3212-3224.
8. Lai, X. et al. (2002) *Extremophiles* 6, 469-477.
9. Rolland, J. et al. (2004) *FEMS Microbiol Lett.* 236, 267-273.
10. Nakatani, M. et al. (2000) *J. Bacteriol.* 182, 6424-6433.
11. Kim Y.J. et al. (2006) *Biotechnol. Lett.* 28, 401-407.
